## 1 **Synthetic antifreeze glycoproteins with potent ice-binding activity**

2 Anna C. Deleray<sup>1</sup>, Simranpreet S. Saini<sup>1</sup>, Alexander C. Wallberg<sup>1</sup>, Jessica R. Kramer<sup>1\*</sup>

3 1. Department of Biomedical Engineering, University of Utah, Salt Lake City, Utah, USA 84112.

4 \*jessica.kramer@utah.edu

### 5 **Abstract**

6 Antifreeze glycoproteins (AFGPs) are produced by extremophiles to defend against tissue  
7 damage in freezing climates. Cumbersome isolation from polar fish has limited probing  
8 AFGP molecular mechanisms of action and limited developing bioinspired  
9 cryoprotectants for application in agriculture, foods, coatings, and biomedicine. Here, we  
10 present a rapid, scalable, and tunable route to synthetic AFGPs (sAFGPs) using *N*-  
11 carboxyanhydride polymerization. Our materials are the first mimics to harness the  
12 molecular size, chemical motifs, and long-range conformation of native AFGPs. We found  
13 that ice-shaping and ice-recrystallization inhibition activity increases with chain length and  
14 Ala is a key residue. Glycan structure had only minor effects and all glycans examined  
15 displayed antifreeze activity. The sAFGPs are biodegradable, non-toxic, and internalized  
16 into endocytosing cells. sAFGPs were found to be bystanders in cryopreservation of  
17 human red blood cells. Overall, our sAFGPs functioned as surrogates for bona fide  
18 AFGPs, solving a long-standing challenge in access to natural antifreeze materials.

19

### 20 **Introduction**

21 Extremophile organisms in cold climates produce specialized antifreeze proteins to  
22 protect their tissues from freezing damage.<sup>1–4</sup> These proteins bind to ice to lower plasma's  
23 freezing point and modify ice crystal shape and size to prevent mechanical damage to  
24 tissues.<sup>5–8</sup> Antifreeze proteins are of great interest for applications in food technology,  
25 agriculture, fisheries, coatings, and in the petroleum industry.<sup>9,10</sup> They have even come  
26 to market as texture-improving ice cream additives.<sup>11</sup> A particularly impactful potential  
27 application is to improve post-thaw tissue viability and function in biomedical  
28 cryopreservation.<sup>12,13</sup>

29 To date, five classes of antifreeze proteins have been identified, including a subgroup  
30 called antifreeze glycoproteins (AFGPs) which are the most potent ice-shaping molecules  
31 ever discovered.<sup>14,15</sup> Identified as the major serum protein of certain Antarctic and Arctic  
32 fish, AFGPs are a fascinating and rare example of convergent evolution.<sup>16</sup> AFGPs consist  
33 of a highly conserved Ala-Ala-Thr repeat, with Thr bearing the disaccharide  
34  $\beta$ Gal(1→3) $\alpha$ GalNAc (Fig. 1A).<sup>7</sup> Isoforms from 2.6–33.7 kDa, classified as AFGP8–  
35 AFGP1, are encoded within polyprotein genes.<sup>16</sup> AFGPs adopt extended polyproline type  
36 II (PPII) helical conformations<sup>17,18</sup>, similar to Pro-rich proteins like collagen and mucins<sup>19</sup>  
37 (Fig. 1A). Compared to the well-known right-handed  $\alpha$ -helix with 3.6 residues/turn, PPII-  
38 helix is left-handed and has 3 residues/turn.<sup>17,18</sup>

39 AFGPs possess two well-established properties: ice recrystallization inhibition (IRI) and  
40 thermal hysteresis (TH). IRI prevents the growth of large ice crystals, while TH produces  
41 a non-colligative freezing point depression and gap between solution freezing and melting  
42 points.<sup>6,8</sup> Effects are observable at concentrations 300–100,000x lower than dissolved

1 salts and sugars.<sup>20</sup> Overall, these properties render AFGPs highly attractive for  
 2 cryopreservation applications in biomedical, agricultural, and food sectors.<sup>9–13</sup>

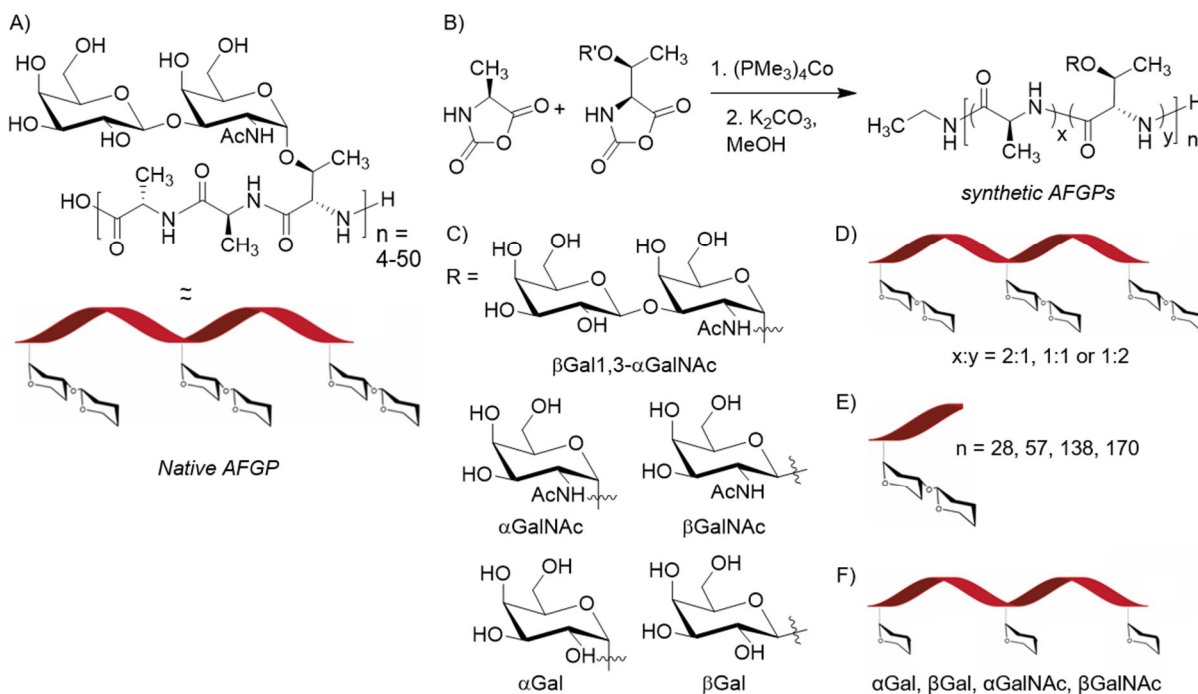

3  
 4 **Figure 1.** Structure of native AFGPs and preparation of sAFGP panel. A) Chemical  
 5 structure of the AFGP tripeptide repeat and native PPII helical conformation. B)  
 6 Preparation of tunable sAFGPs by NCA polymerization using transition metal catalysis.  
 7 C) Structures of the five glycans utilized in the sAFGP panel. sAFGPs were prepared with  
 8 varying D) ratios of Ala:glyco-Thr, E) molecular weights, and F) glycans.

9  
 10 Despite their potential, there are no commercial AFGP sources. Isolating the proteins  
 11 requires a polar fishing trip followed by labor-intensive fractionation that still yields  
 12 heterogeneous mixtures of isoforms and potential contamination with strong allergens.<sup>15</sup>  
 13 Additionally, high molecular weight (MW) native AFGPs (50–150 residues, 10.5–34 kDa)  
 14 are much more active than low MW AFGPs (12–38 residues, 2.6–7.9 kDa) but are of low  
 15 abundance.<sup>6,8,15,21</sup> The proteins have so far resisted recombinant production.<sup>9,10,22</sup>  
 16 Synthetic approaches using solid-phase synthesis or step-growth polymerizations have  
 17 been beautifully explored, but are laborious and limited to low-activity, low-MW  
 18 AFGPs.<sup>10,23–35</sup> Additionally, many structures utilized non-native residues/glycans that  
 19 could affect biocompatibility. Poly(vinyl alcohol) (PVA) has been investigated as a  
 20 polyhydroxylated surrogate<sup>36</sup> while polyproline has been utilized to capture the PPII  
 21 conformation<sup>37</sup>. These structures are reportedly orders of magnitude less active than even  
 22 low MW AFGPs. PVA has shown mixed results in combination with traditional  
 23 cryoprotectants.<sup>36,38,39</sup> Various other mimics have been investigated but have shown little  
 24 or no IRI activity.<sup>22,32,40–44</sup>

25 A need remains for an accessible route to AFGPs, and that allows molecular tuning to  
 26 probe the characteristics that drive ice-binding. Here, we present a rapid, scalable, and

1 tunable route to AFGPs (sAFGPs) using amino acid *N*-carboxyanhydride (NCA)  
2 polymerization (Fig. 1B–F). Our building blocks were prepared on gram-scale and the  
3 NCA method is used commercially.<sup>45</sup> The approach allows precise control over  
4 polypeptide backbone MW, composition, and glycosylation.<sup>46,47</sup> We tuned these factors  
5 to optimize activity and to reveal long-debated molecular drivers of antifreeze activity.  
6 Finally, we probed the interaction of sAFGPs with model biological systems.

## 7 **Results and Discussion**

### 8 **Design and synthesis of sAFGP panel**

9 Despite nearly 70 years of study, the molecular details of AFGP ice-binding are debated.  
10 The generally accepted mechanism involves a protein ice-binding face and a non-binding  
11 face.<sup>48–50</sup> After adsorption to an embryonic ice crystal, the non-binding face disorders  
12 approaching liquid water molecules, resulting in inhibited crystal growth, ice shaping, and  
13 lowered melting point. However, the roles of hydrophobic Ala versus hydrophilic sugars  
14 in these faces are unclear.

15 Molecular dynamics modeling of a 14-residue AFGP predicted the PPII structure is crucial  
16 and that Ala methyls nest into ice-surface cavities driven by the entropy of dehydration.<sup>51</sup>  
17 An alternative model proposed amphipathic binding where Ala methyls and glycan  
18 hydroxyls cooperatively bind ice.<sup>52</sup> Ice-binding via the hydroxyls alone has also been  
19 proposed based on observation of fluorescently-labeled AFGPs on ice crystal surfaces  
20 and because activity was disrupted by sugar-complexing borate.<sup>5,6,53,54</sup> Additionally,  
21 AFGPs adsorb more efficiently to hydrophilic surfaces<sup>55,56</sup> and monolayers of  
22  $\beta$ Gal(1→3) $\alpha$ GalNAc alone shape ice.<sup>57</sup>

23 Prior work indicated loss of activity due to oxidation, alkylation, and borylation of AFGP  
24 disaccharides.<sup>14,58,59</sup> Tachibana et al. conducted the most comprehensive study of glycan  
25 structure to date.<sup>34</sup> They compared 6–9 residue AFGP fragments bearing the  $\alpha$  vs  $\beta$ -  
26 linked native disaccharide,  $\alpha$ Gal vs  $\alpha$ GalNAc, and other glycans. They observed  
27 significant differences in TH and IRI behavior and identified the  $\alpha$ -linkage and the C2  
28 NHAc group as particularly important for activity. However, their peptides could only make  
29 2–3 PPII-helical turns, and this assumes end-group participation. Experimental evidence  
30 using native AFGPs indicates activity is strongly dependent upon MW. However, data is  
31 convoluted since, due to purification challenges, experiments were conducted on pooled  
32 fractions.

33 To explore AFGP structure-function, we synthesized sAFGPs via NCA polymerization  
34 using our established methods.<sup>46,47</sup> We varied chain length, glycosylation pattern, and  
35 hydrophobicity (Fig. 1B–F). To explore the role of MW, 28–170mers were prepared (Fig.  
36 1E). To probe the role of Ala methyls vs. glycan hydroxyls, we prepared glycopolypeptides  
37 with varied densities of the two residues. The native amino acid ratio of 2:1 Ala:Thr was  
38 increased to 1:1 or 1:2 (Fig. 1D).

39 To explore glycosylation's role in PPII structure and sAFGPs antifreeze activity, we  
40 prepared glyco-Thr conjugates bearing  $\alpha$ Gal,  $\beta$ Gal,  $\alpha$ GalNAc,  $\beta$ GalNAc, or native  
41 disaccharide  $\beta$ Gal(1→3) $\alpha$ GalNAc (abbreviated as  $\beta$ Gal $\alpha$ GalNAc) (Fig. 1C, F). These  
42 glycans might differently affect hydrogen-bonding or protein secondary structure.<sup>47,60,61</sup>  
43 NMR studies on short  $\alpha$ GalNAc-Thr/Ser peptides suggested an intramolecular hydrogen

1 bond between the sugar *N*-Ac and Thr carbonyl is a stabilizing force for the PPII structure.  
2 However, our recent CD studies of high MW glycosylated polyThr indicated that the PPII  
3 conformation is adopted in structures lacking the *N*-Ac group (i.e. Gal instead of GalNAc).  
4 Ala NCA was prepared from Ala in one step by treatment with phosgene in  
5 tetrahydrofuran (THF).<sup>46</sup> Peracetylated glyco-Thr conjugates were prepared using  
6 literature protocols (See Supplemental Information (SI)).<sup>26,47,62</sup> All conjugates were  
7 converted to NCAs from their tert-butyloxycarbonyl-forms by treatment with triphosgene  
8 and triethylamine in THF, via our previously optimized conditions.<sup>47</sup> Direct phosgenation  
9 of glyco-Thrs in the same manner as Ala results in poor yields. In all cases, NCAs were  
10 isolated by anhydrous chromatography to give crystalline monomer.<sup>63</sup>

11 Glyco-Thr and Ala NCAs were converted to sAFGPs using  $(\text{PMe}_3)_4\text{Co}$  catalyst in THF  
12 (Fig. 1B). NCA:catalyst ratios were varied to tune degree of polymerization (DP) and  
13 monomer feed ratios varied to tune composition. Complete monomer consumption was  
14 evidenced by infrared spectroscopy. NCA carbonyl stretches at  $\sim 1850$  and  $1790\text{ cm}^{-1}$   
15 disappeared, while peptide carbonyl stretches at  $\sim 1650$  and  $1540\text{ cm}^{-1}$  emerged (See SI).  
16 Peracetylated sAFGPs were characterized by  $^1\text{H}$  NMR and size exclusion  
17 chromatography coupled to multi-angle light scattering and refractive index  
18 (SEC/MALS/RI) (Fig.2A, Table 1, see SI). MW and DP correlated well with expected  
19 values.

20 **Table 1.** Representative data for characterization of sAFGP polymers prepared using  
21  $(\text{PMe}_3)_4\text{Co}$  in THF. [a] Sample name and amino acid composition. [b,c]  $M_n$ , and  $\bar{D}$  as  
22 determined by SEC/MALS/RI in DMF with 0.1M LiBr at 60 °C. All polymers were analyzed  
23 in their peracetylated forms. - indicates samples which were insoluble in the SEC mobile  
24 phase and were therefore analyzed by  $^1\text{H}$  NMR and  $\bar{D}$  was not determined. [d] Observed  
25 degree of polymerization (DP).

| sAFGP <sup>[a]</sup>                                               | $M_n$ <sup>[b]</sup> | $\bar{D}$ <sup>[b]</sup> | DP <sup>[c]</sup> |
|--------------------------------------------------------------------|----------------------|--------------------------|-------------------|
| $(\beta\text{GalT}_{0.33}\text{-s-A}_{0.66})_n$                    | 17,680               | -                        | 93                |
| $(\alpha\text{GalT}_{0.33}\text{-s-A}_{0.66})_n$                   | 17,680               | -                        | 93                |
| $(\beta\text{GalNAcT}_{0.33}\text{-s-A}_{0.66})_n$                 | 17,649               | -                        | 93                |
| $(\alpha\text{GalNAcT}_{0.33}\text{-s-A}_{0.66})_n$                | 17,649               | -                        | 93                |
| $(\beta\text{Gal}\alpha\text{GalNAcT}_{0.33}\text{-s-A}_{0.66})_n$ | 8,134                | 1.81                     | 28                |
| $(\beta\text{Gal}\alpha\text{GalNAcT}_{0.33}\text{-s-A}_{0.66})_n$ | 16,460               | 1.27                     | 57                |
| $(\beta\text{Gal}\alpha\text{GalNAcT}_{0.33}\text{-s-A}_{0.66})_n$ | 39,680               | 1.17                     | 138               |
| $(\beta\text{Gal}\alpha\text{GalNAcT}_{0.33}\text{-s-A}_{0.66})_n$ | 48,830               | 1.39                     | 170               |
| $(\beta\text{Gal}\alpha\text{GalNAcT}_{0.5}\text{-s-A}_{0.5})_n$   | 20,490               | 1.47                     | 52                |
| $(\beta\text{Gal}\alpha\text{GalNAcT}_{0.66}\text{-s-A}_{0.33})_n$ | 23,140               | 1.31                     | 46                |

1

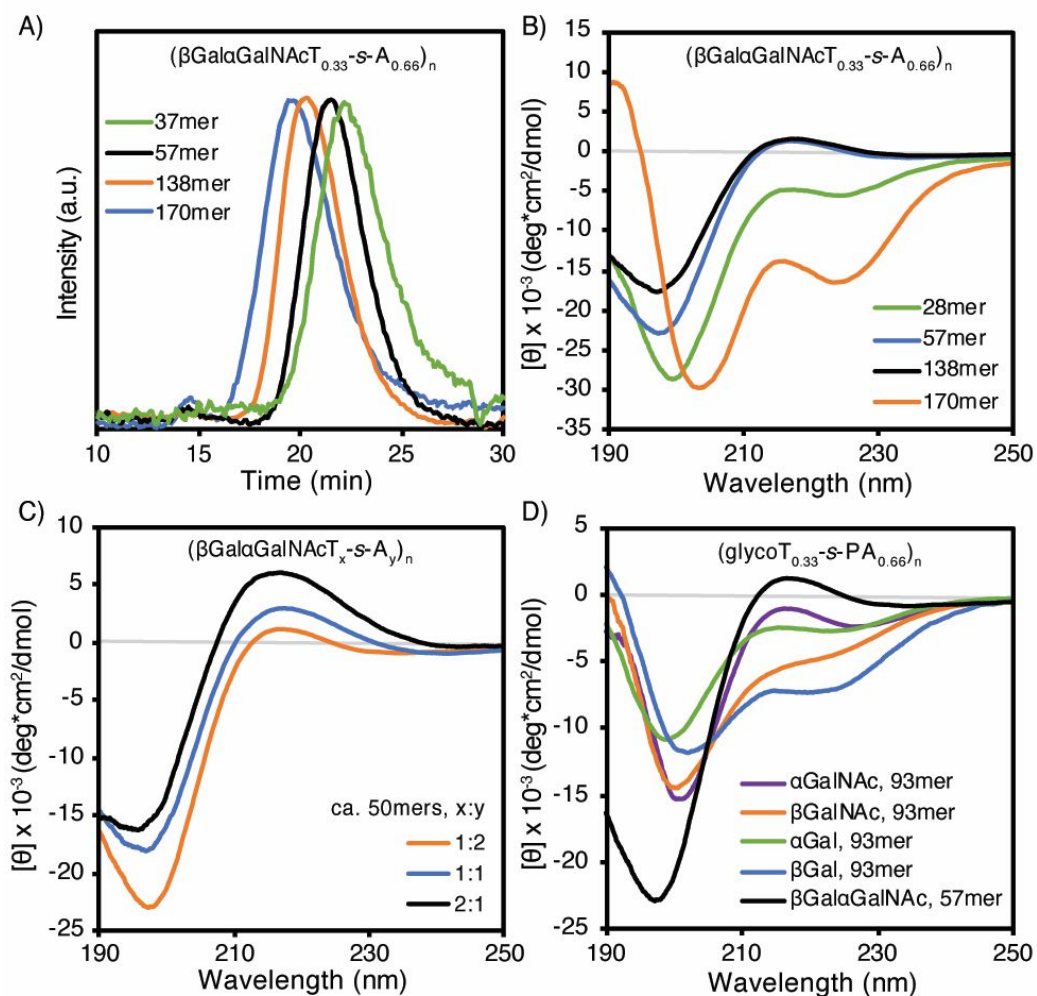

2

3 **Figure 2.** Characterization of sAFGP molar masses and conformations. A) SEC/MALS/RI  
 4 in dimethylformamide with 0.1M LiBr, indicating differing elution times for peracetylated  
 5 chains of increasing lengths. B–D) Aqueous CD spectra of deacetylated sAFGPs where  
 6 B) are structures with increasing molecular weights, C) are structures with increasing  
 7  $\beta$ Gal $\alpha$ GalNAcThr content, and D) are structures bearing glycans of differing identity and  
 8 anomeric orientation.

9

## 10 Characterization of sAFGP structure

11 Circular dichroism (CD) was used to characterize sAFGP secondary structures. Distinct  
 12 signatures are observed for the  $\eta \rightarrow \pi^*$  and  $\pi \rightarrow \pi^*$  transitions of PPII, disordered, sheet,  
 13 or  $\alpha$ -helical conformations.<sup>64–67</sup> Homopolymers of  $\beta$ GalNAc- or  $\beta$ Gal $\alpha$ GalNAc-Thr have  
 14 not been previously prepared; however, our previous work on  $\alpha$ GalNAc-,  $\alpha$ Gal-, and  $\beta$ Gal-  
 15 bearing polyThr revealed they adopt extended PPII conformations.<sup>47</sup> The  $\alpha$ GalNAc amide  
 16 positive ellipticity between 190–200 nm overlaps with the peptide  $\pi \rightarrow \pi^*$  transition.<sup>47</sup>

1 For sAFGPs with native 1:2 Thr:Ala and  $\beta$ Gal $\alpha$ GalNAc, MW-dependent secondary  
2 structures were observed (Fig. 2B). The 28mer (equivalent to AFGP7–AFGP6), exhibited  
3 a combination of disordered and PPII conformations as evidenced by minor absorbance  
4 at  $\sim$ 217 nm in the PPII region, and spectral alignment with denatured collagen and  
5 intrinsically disordered proteins.<sup>66,67</sup> This was expected considering the 28mer can only  
6 make  $\sim$ 9 PPII-helical turns. Helical propensity increases with chain length,<sup>19,46</sup> which  
7 explains the classic PPII structure observed for 57- and 138-mers (maxima at  $\sim$ 217 nm,  
8 minima at  $\sim$ 197 nm). Our spectra correlate nicely with those of native AFGP5–  
9 AFGP2.<sup>17,26,59</sup> Spectra obtained in water and phosphate buffered saline (PBS) were  
10 identical and sAFGP conformation was stable from 4–50°C (see SI).

11 The disaccharide-sAFGP 170mer adopted a mix of PPII- and presumably  $\alpha$ -helices  
12 (minimum shift to 203nm, new minimum at 223nm), observed in multiple batches and  
13 spectral runs. PolyAla is a known  $\alpha$ -helix former<sup>68</sup>, so we hypothesize larger MWs may  
14 facilitate Ala-rich microdomains. Though it is surprising the 32 additional residues could  
15 have this effect. However, compared to PPII,  $\alpha$ -helical conformations have higher  
16 intensity absorbances at identical protein concentrations and therefore could be of low  
17 relative abundance. In any case, antifreeze activity was not affected (vide infra). Overall,  
18 we found that low MW sAFGPs are far less ordered than high MW AFGPs, correlating  
19 well with observations of native AFGPs.

20 Glycan identity and density also play a role in sAFGP conformation. Increasing  
21  $\beta$ Gal $\alpha$ GalNAcThr content, while decreasing Ala, led to proportional increases in extended  
22 PPII structure (maxima at  $\sim$ 217nm, Fig. 2C). Clearly,  $\beta$ Gal $\alpha$ GalNAc-Thr drives the PPII  
23 conformation. Truncation to  $\alpha$ GalNAc in native 1:2 Thr:Ala structures resulted in reduced  
24 PPII propensity (reduced absorbance at 217 nm, Fig. 2D).  $\alpha$ Gal,  $\beta$ Gal, and  $\beta$ GalNAc  
25 polymers adopt predominantly disordered conformations, indicated by the absence or  
26 reduction of the 217 nm band. These data suggest that the  $\alpha$ GalNAc group partially  
27 orients the peptide into PPII helices, which is further stabilized by  $\beta$ Gal(1 $\rightarrow$ 3) glycan  
28 extension.

### 29 **sAFGP antifreeze activity assays**

30 Native AFGPs bind irreversibly to embryonic ice crystals, inhibiting prism-face growth and  
31 influencing overall shape and size. This results in a reduction in mean grain size (MGS),  
32 i.e. IRI, and shaping of single crystals into characteristic hexagonal and bipyramidal  
33 structures (Fig. 3A).<sup>5</sup> We used cryostage microscopy and cooling splat assays to observe  
34 ice shaping and IRI activity for sAFGP  $\sim$ 50mers with varied  $\beta$ Gal $\alpha$ GalNAcThr:Ala ratios.<sup>15</sup>  
35 Our controls were PBS and common cryoprotectant dimethylsulfoxide (DMSO).<sup>69</sup>

36 Increasing Ala content correlated with higher IRI activity and stronger ice-shaping  
37 properties (Fig. 3B–D). Polymers with 33% Ala displayed no IRI activity and had no effect  
38 on crystal shape. Those with 50% Ala showed minor IRI activity (22% MGS reduction)  
39 but had little impact on crystal shape. By contrast, sAFGPs with native 66% Ala and 33%  
40  $\beta$ Gal $\alpha$ GalNAcThr exhibited remarkably potent IRI activity analogous to that of native  
41 AFGPs (95% MGS reduction).<sup>5–8,44</sup> They also displayed identical hexagon-inducing ice-  
42 shaping properties as native AFGPs<sup>5,6</sup>. These findings highlight the importance of Ala for  
43 the ice-binding properties of (s)AFGPs.

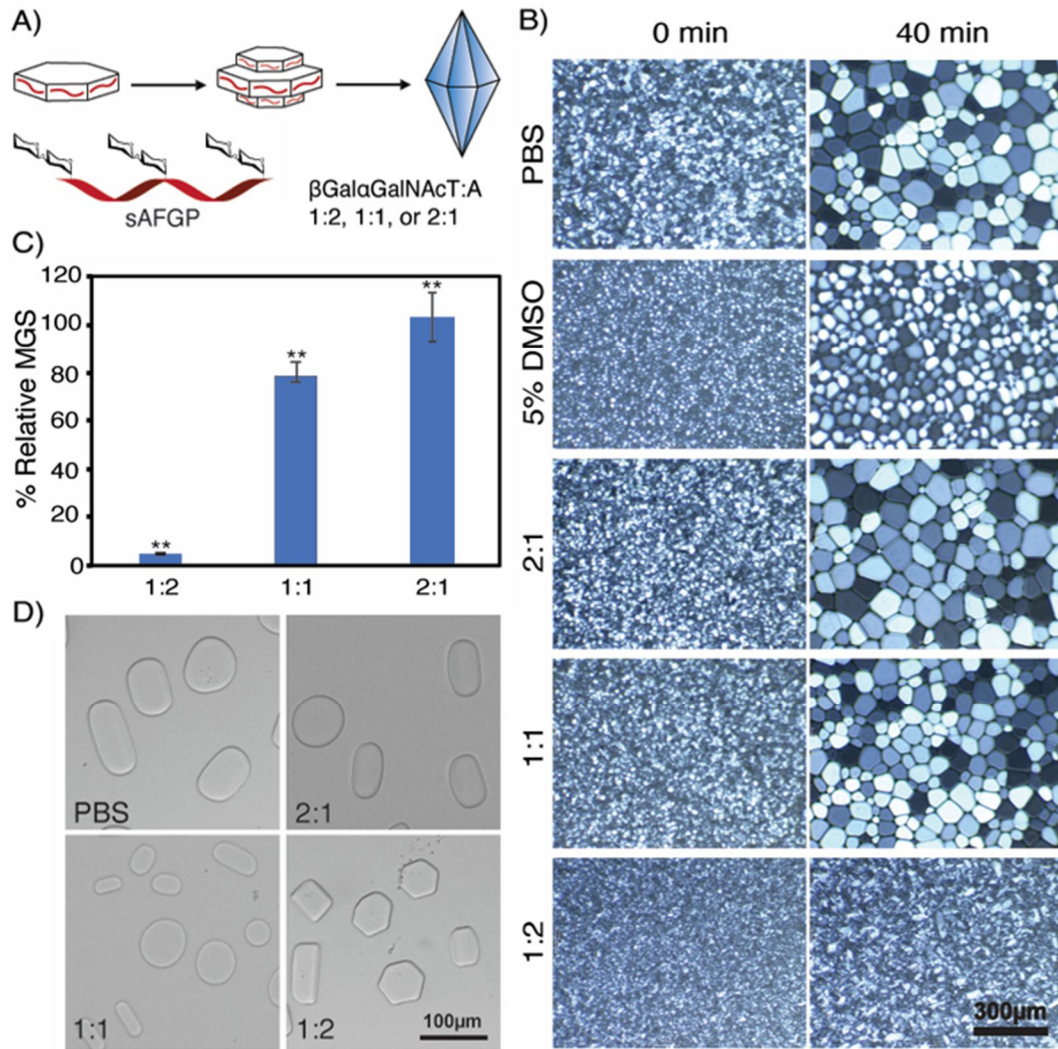

1  
2 **Figure 3.** Ice binding properties of sAFGPs with varying amino acid compositions. A)  
3 Cartoon illustration of ice binding and shaping in the presence of sAFGPs composed of  
4 1:2, 1:1, or 2:1  $\beta\text{Gal}\alpha\text{GalNAcThr:Ala}$  ca. 50mers. B) Images of cooling splat assays and  
5 IRI activity for 71  $\mu\text{M}$  sAFGP or 5 wt.% DMSO in PBS, or PBS alone. C) Quantified IRI  
6 data as % MGS relative to PBS; mean and standard deviation, \*\* indicates  $p < 0.01$ . D)  
7 Ice shaping experiments with 71  $\mu\text{M}$  sAFGP in PBS.

8 IRI and ice-shaping also depended upon MW. Native ratio 1:2  $\beta\text{Gal}\alpha\text{GalNAcThr:Ala}$   
9 polymers 28, 57, or 170mers exhibited IRI activity that increases with chain length (Fig.  
10 4A,B). Compared to PBS, the relative MGS reduction was 89% for sAFGP, 94% for  
11 57mers, and 97% for 170mers. These data align with those of native AFGPs where  
12 AFGP1-5 (33.7–10.5kDa) show higher IRI than AFGP8 (2.65 kDa).<sup>5,14</sup> Ice-shaping  
13 strength also increased with sAFGP chain length; 28mers resulted in amorphous,  
14 rounded crystals, while 57mers and 170mers produced angular crystals with hexagonal  
15 or rectangular morphologies (Fig. 4C).

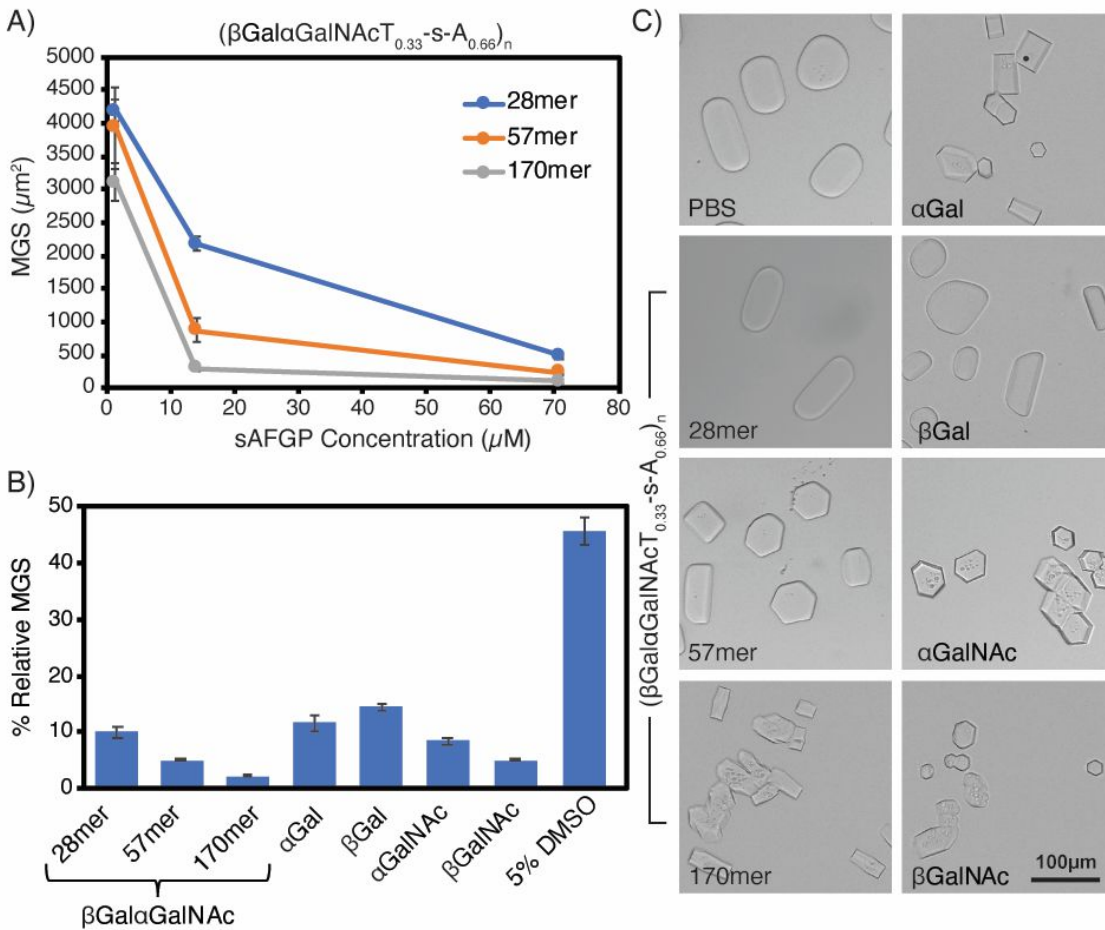

1  
 2 **Fig. 4.** Ice binding data for sAFGPs composed of the native 1:2 glycoT:A ratio and with  
 3 varied chain lengths and varied glycan structures. A) Observed absolute MGS at varied  
 4 concentrations for sAFGPs with the native  $\beta\text{Gal}\alpha\text{GalNAc}$  disaccharide and with chain  
 5 lengths of 28, 57, 170 residues. B) Quantified IRI data as % MGS relative to PBS for  
 6 native disaccharide sAFGPs of varied chain lengths as compared to sAFGP 93mers  
 7 bearing monosaccharides of varied structure and anomeric linkages, or 5% DMSO;  
 8 sAFGP concentration is 71  $\mu\text{M}$  in PBS; ice crystal MGS was determined from cooling  
 9 splat assays; mean and standard deviation; table of statistical significance is in the SI. C)  
 10 Ice shaping experiments for native disaccharide sAFGPs of varied chain lengths as  
 11 compared to sAFGP 93mers bearing glycans of varied structure and anomeric linkages;  
 12 sAFGP concentration is 71  $\mu\text{M}$  in PBS.

13  
 14 Finally, we examined ice-shaping and IRI activity of sAFGPs with the native Thr:Ala ratio,  
 15 moderate chain lengths (93mers), and varied glycans. All sAFGPs, regardless of glycan  
 16 identity, exhibited strong IRI activity (Fig. 4B). Structures lacking NAc groups ( $\alpha\text{Gal}$  and  
 17  $\beta\text{Gal}$ ) had slightly lower activity than those with NAc ( $\alpha\text{GalNAc}$  and  $\beta\text{GalNAc}$ ) but  
 18 remained potent antifreeze agents. Relative ice crystal MGSs from ( $\alpha\text{GalT}_{0.33}\text{-s-A}_{0.66}$ )<sub>93</sub>  
 19 and ( $\beta\text{GalT}_{0.33}\text{-s-A}_{0.66}$ )<sub>93</sub> solutions were reduced by 88% and 85%, respectively.  
 20 ( $\alpha\text{GalNAcT}_{0.33}\text{-s-A}_{0.66}$ )<sub>93</sub> and ( $\beta\text{GalNAcT}_{0.33}\text{-s-A}_{0.66}$ )<sub>93</sub> displayed higher activity, resulting in



1 a relative MGS reduction of 92% and 97%. Comparing IRI activity on a mass basis yielded  
2 a similar trend (see SI). By contrast, 5% DMSO only achieved a 54% relative reduction.  
3 In a side-by-side trial, higher PVA concentrations were required to achieve a similar MGS  
4 reduction as our sAFGPs (see SI). Overall, our highest MW sAFGP of native composition,  
5 ( $\beta$ Gal $\alpha$ GalNAcT<sub>0.33</sub>-s-A<sub>0.66</sub>)<sub>170</sub>, demonstrated the strongest IRI properties.

6 Ice-shaping patterns of glycan-variable sAFGPs aligned with IRI trends (Fig. 4C).  $\alpha$ Gal-  
7 or  $\beta$ Gal-sAFGPs resulted in a mix of rounded and rectangular crystals, while  $\alpha$ GalNAc-  
8 and  $\beta$ GalNAc-sAFGPs produced predominantly ordered, angular-faced structures.  
9 Intriguingly, ( $\alpha$ GalNAcT<sub>0.33</sub>-s-A<sub>0.66</sub>)<sub>93</sub> induced hexagonal crystal growth similar to native  
10 AFGPs<sup>5,14</sup> and our disaccharide-sAFGP. These data suggest the  $\alpha$ GalNAcThr plays a  
11 role in sAFGP ice-binding, either directly or indirectly by favorably orienting Ala or Thr  
12 methyls.

13 Our findings contradict the widely-cited study by Tachibana et al., which claimed the  $\alpha$ -  
14 linkage, C2 NAc, and disaccharide were essential for antifreeze activity.<sup>34</sup> By contrast,  
15 our structures with mono- and di-saccharides,  $\alpha$ - and  $\beta$ -linkages, and with or without C2  
16 NAc exhibit potent IRI activity. In the prior work, conclusions were drawn from structures  
17 of only ca. 6–9 amino acids that cannot adopt long-range conformations and have  
18 differing entropic considerations than macromolecular proteins. By contrast, our sAFGPs  
19 are comparable in size to native AFGPs and adopt ordered, stable PPII structures.  
20 Interestingly, our data also indicate the tripeptide repeat is unnecessary since our  
21 structures have statistically distributed residues.

## 22 **Cytocompatibility, cell internalization, and degradation of sAFGPs**

23 In polar fish, AFGPs are present in the interstitial fluid of all body tissues except brain  
24 tissue, but intracellular accumulation has not been observed.<sup>70</sup> Surprisingly, little is known  
25 regarding intracellular accumulation of AFGPs in the context of cryopreservation. A single  
26 report describes internalization of AFGP8 in human embryonic liver cells and trout gill  
27 cells.<sup>71</sup> Additionally, limited evidence suggests cell membrane interactions.<sup>72–74</sup>  
28 Therefore, we investigated the interaction of our sAFGPs with live human cells.

29 We labeled ( $\beta$ Gal $\alpha$ GalNAcT<sub>0.33</sub>-s-A<sub>0.66</sub>)<sub>57</sub> with AF594 using *N*-hydroxysuccinimide ester  
30 chemistry. We investigated internalization in human red blood cells (hRBCs), white blood  
31 cells (Raji), and embryonic kidney cells (HEK293), representing suspension and adherent  
32 models either of therapeutic value or to benchmark against the previous AFGP8 study.  
33 Following a 1-hour incubation with sAFGP-594 at 37°C, we observed substantial  
34 internalization and distribution within Raji and HEK cells, but not within hRBCs (Fig. 5A  
35 and SI). As hRBCs do not normally endocytose<sup>75</sup>, this suggests an endocytic uptake  
36 mechanism rather than passive translocation. Additionally, we examined uptake at  
37 endocytosis-inhibiting temperatures (4 °C, 23 °C), and minimal sAFGP was internalized  
38 (Fig. 5A). Work is underway to probe this phenomenon.

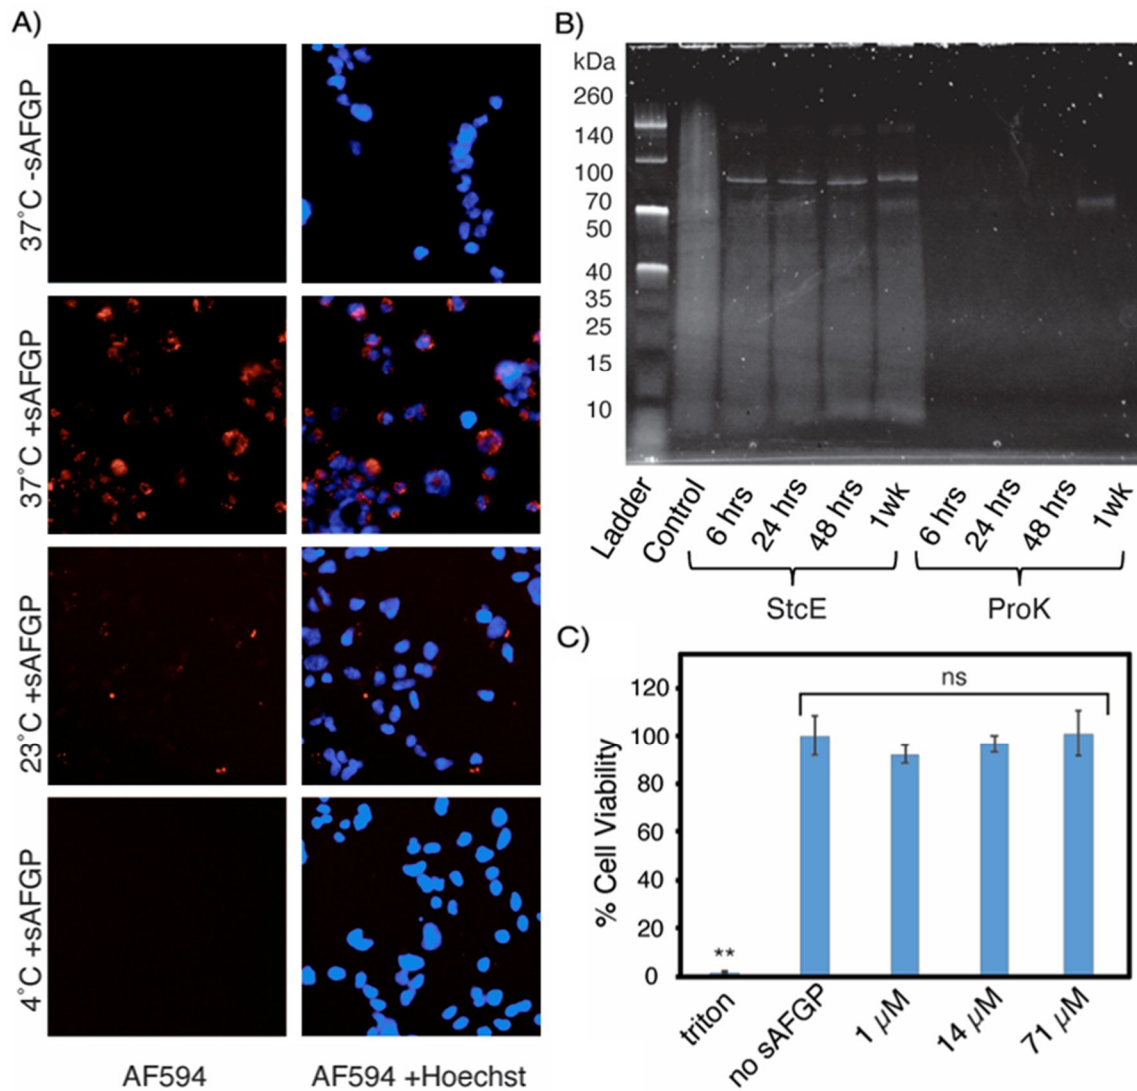

1 **Figure 5.** Cellular internalization, biodegradation, and cytocompatibility of sAFGPs with  
2 the native 1:2 glycoT:A composition and bearing the native disaccharide. A)  
3 Internalization of sAFGP 10  $\mu$ M AF594-( $\beta$ Gal $\alpha$ GalNAcT<sub>0.33</sub>-s-A<sub>0.66</sub>)<sub>57</sub> in HEK293 cells at  
4 4, 23, or 37 °C. B) SDS-PAGE of protease-treated ( $\beta$ Gal $\alpha$ GalNAcT<sub>0.33</sub>-s-A<sub>0.66</sub>)<sub>98</sub> at varied  
5 timepoints, stained with glycoprotein-specific Pro-Q Emerald 300. C) HEK 293 cell  
6 viability as determined by CCK8 assay following 24-hour incubation with sAFGP  
7 ( $\beta$ Gal $\alpha$ GalNAcT<sub>0.33</sub>-s-A<sub>0.66</sub>)<sub>57</sub> at the indicated concentrations; no sAFGP is media alone  
8 as a negative control and Triton X-100 was a positive control; standard deviation; \*\*  
9 indicates  $p < 0.01$ .

10

11 Considering (s)AFGPs can be endocytosed, we investigated their potential for protease  
12 degradation. We treated moderately-sized sAFGP ( $\beta$ Gal $\alpha$ GalNAcT<sub>0.33</sub>-s-A<sub>0.66</sub>)<sub>98</sub> with non-  
13 specific proteinase K (ProK), which cleaves preferentially after hydrophobic sites<sup>76</sup>, and  
14 glycoprotease secreted protease of C1 esterase (StcE), which cleaves before  $\alpha$ GalNAc-

1 Ser/Thr<sup>77</sup>. ProK efficiently degraded the sAFGP within six hours while StcE only partially  
2 degraded the sample over one week (Fig. 5B); likely StcE prefers a monosaccharide  
3 substrate. Overall, sAFGPs are unlikely to bioaccumulate.

4 Toxic effects were unexpected since native AFGPs are present at up to 25 mg/mL in fish  
5 blood<sup>1</sup> and similar synthetic glycopolypeptides are non-toxic<sup>78</sup>. Considering their validated  
6 internalization behavior, we assessed ( $\beta$ Gal $\alpha$ GalNAcT<sub>0.33</sub>-s-A<sub>0.66</sub>)<sup>57</sup> with HEK293 cells.  
7 CCK8 assays were conducted after 24 hours at 37°C with sAFGP concentrations relevant  
8 to IRI. At the highest concentration tested, there were no statistically significant effects on  
9 cellular viability (Fig. 5C), indicating the material's suitability for cryopreservation  
10 applications.

### 11 **sAFGPs as Cellular Cryoprotectants**

12 Cryopreservation is crucial for preserving cells and tissues for regenerative medicine and  
13 research, but requires use of cryoprotective agents (CPAs) to prevent ice crystal  
14 formation and cell damage.<sup>12,13</sup> Little has changed in over 70 years<sup>79</sup> and DMSO and  
15 glycerol are standard CPAs despite well-known toxic effects.<sup>69,80</sup> Hydroxyethyl starch  
16 (HES) is a newer better-tolerated CPA, favorable due to membrane-impermanence, but  
17 still has associated toxic effects.<sup>81</sup> Plus, excessive solution viscosity presents processing  
18 challenges. AFGPs have potential to revolutionize biomedical cryopreservation by  
19 replacing or reducing toxic CPAs. However, conflicting results and a lack of consensus  
20 on optimal cryopreservation conditions hinder their widespread use.<sup>82,83</sup>

21 For an initial study, we benchmarked our sAFGPs against a report utilizing native AFGPs  
22 combined with HES to freeze hRBCs.<sup>72</sup> In their study, flash-freezing in liquid nitrogen with  
23 130 mg/mL HES and slow thawing at ~20°C resulted in 12% cell survival. Addition of 1–  
24 800  $\mu$ g/mL AFGP1–5 increased cell recovery up to 24%, but did not scale linearly and  
25 was optimized at 200  $\mu$ g/mL. In our hands, hemolysis assays after flash-freezing of  
26 hRBCs with 130 mg/mL HES and 0–400  $\mu$ g/mL ( $\beta$ Gal $\alpha$ GalNAcT<sub>0.33</sub>-s-A<sub>0.66</sub>)<sup>170</sup> followed by  
27 slow thaw at 23°C resulted in 3% cell recovery for PBS and 80% for HES alone, which  
28 hindered observation of any sAFGP effects (Fig. 6A, B). Therefore, we assessed hRBC  
29 hemolysis at varied HES concentrations and identified 40 mg/mL as having 20% post-  
30 thaw viability (see SI). Freeze-thaw experiments with 40 mg/mL HES supplemented with  
31 0–400  $\mu$ g/mL sAFGP showed no statistically significant effect of the sAFGPs on hRBC  
32 survival. Similar results were obtained for HEK293 cells (see SI).

33 This result was not surprising considering the modest effects of the native AFGP-HES  
34 combination in the prior study. In fact, in their work, freeze-thaw with AFGPs alone  
35 actually decreased cell survival as compared to PBS alone. Differences in our studies  
36 could be due to HES molecular weight or functionalization degree, which were not  
37 reported, varying thaw methodology, or the heterogeneity of native AFGPs and their  
38 challenging purification. Given the potent IRI and ice shaping activity of the sAFGPs,  
39 which are comparable to native AFGPs, further research on freezing methodology and  
40 CPA combinations are warranted and are underway.

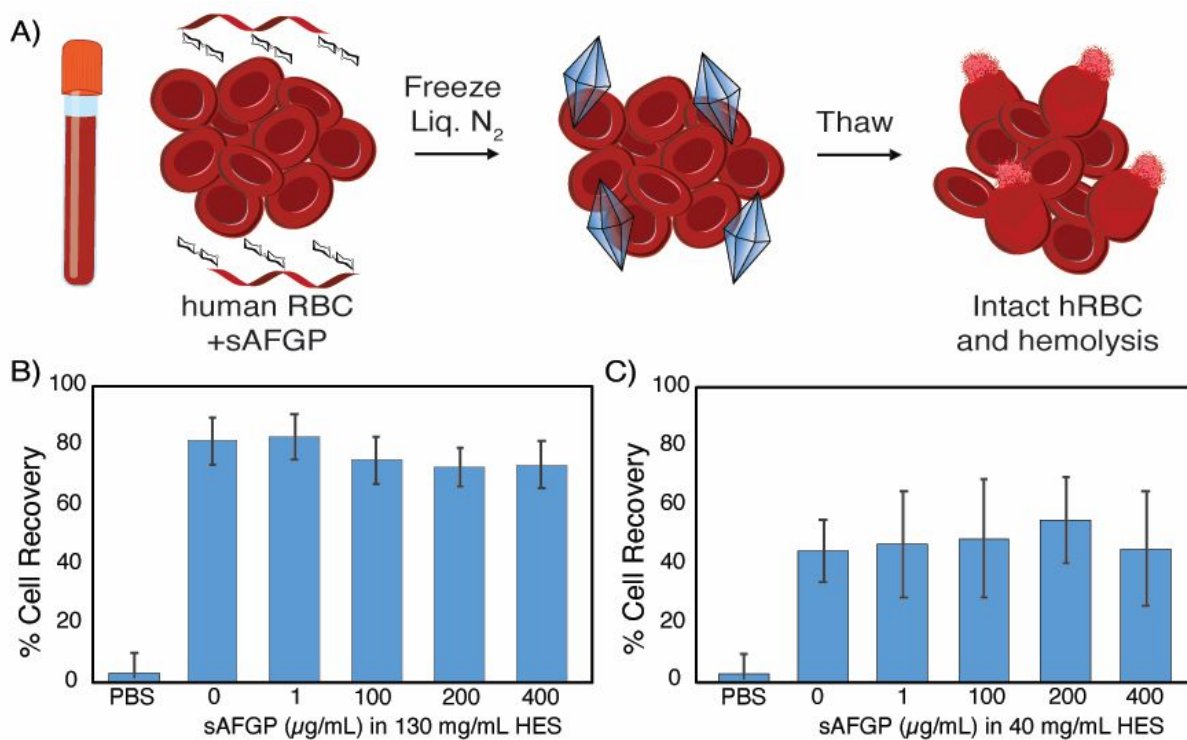

1  
2 **Figure 6.** Cryopreservation of hRBCs in sAFGP supplemented HES solutions or PBS  
3 alone. A) Schematic representation of hRBC cryopreservation experimental workflow and  
4 cell hemolysis as the assessment metric of cell survival. B, C) Post-thaw intact hRBC cell  
5 recovery by hemolysis assays after freezing with sAFGP ( $\beta\text{Gal}\alpha\text{GalNAcT}_{0.33}\text{-s-A}_{0.66}$ )<sub>170</sub>  
6 and B) 130mg/mL HES or C) 40mg/mL HES. Data are the result of two separate  
7 experiments performed in triplicate. Within each experiment, the cell recovery is not  
8 statistically different across the varied treatments.

## 9 **Conclusions**

10 AFGPs have diverse applications in agriculture, food, surface coatings, and biomedical  
11 tissue cryopreservation. However, their isolation from polar organisms is cumbersome  
12 and impractical, hindering research on these unique molecules and their mechanisms of  
13 action. Here, we present a rapid and scalable method to synthetic AFGPs, allowing facile  
14 customization of molar mass and amino acid and glycan composition. We investigated a  
15 range of structures and found that hydrophobic Ala is essential for antifreeze activity, and  
16 potency increasing with molecular weight. While the native disaccharide displayed the  
17 highest potency, all glycan structures examined exhibited IRI properties. Our synthetic  
18 AFGPs endocytosed by human cell lines, are non-toxic and biodegradable, but did not  
19 alter red blood cell cryopreservation outcomes when used in combination with HES. In  
20 ice-binding studies, the synthetic AFGPs performed essentially identically to native  
21 AFGPs, indicating their promise as surrogates for these elusive natural structures.

## 22 **Methods**

### 23 **General method for polymerization of NCAs**

1 All polymerizations were prepared in a N<sub>2</sub> filled glovebox. NCAs were dissolved in  
2 anhydrous THF at 50mg/mL in a glass vial or bomb tube. To the NCA solution, a 30mg/mL  
3 solution of (PMe<sub>3</sub>)<sub>4</sub>Co in THF was added and the tube was sealed. The NCA:(PMe<sub>3</sub>)<sub>4</sub>Co  
4 ratio ranged from 10:1 to 80:1, yielding different length polypeptides. The vials were left  
5 in the glove box at RT and the bomb tubes were removed from the gloved box and heated  
6 at 50°C for 5-72hrs. The reaction progress was monitored by attenuated total reflectance-  
7 Fourier transformed infrared spectroscopy (ATR-FTIR). Upon completion, the  
8 polypeptides were analyzed with SEC/MALS/RI.

### 9 **General method for polymerization of statistical copolymers**

10 Copolymers were prepared in a N<sub>2</sub> filled glovebox in a manner similar to homopolymers.  
11 The NCAs were dissolved in THF at 50mg/mL and mixed at a variety of NCA molar ratios.  
12 (PMe<sub>3</sub>)<sub>4</sub>Co catalyst in THF (30mg/mL) was added to the combined NCA solutions and  
13 the reaction progressed at RT and was monitored by ATR-FTIR. Polypeptides that  
14 remained soluble were analyzed using SEC/MALS/RI.

### 15 **General method for observing dynamic ice shaping**

16 10uL of solution containing sAFGP in 1X PBS was placed on a microscope slide and  
17 sandwiched between a cover slip. The stage was rapidly cooled at a rate of 10°C/min to  
18 -30°C to freeze the solution. The stage was then slowly warmed to -2.5°C at a rate of  
19 8°C/min. Then the stage was warmed to -1.8°C at a rate of 0.5°C/min. The stage  
20 temperature was then increased at a rate of 0.05°C/min to -1.5 to -1°C depending on the  
21 polypeptide solution to isolate individual crystals. The stage was then cooled at  
22 0.02°C/min to -2 to -1.5°C to observe dynamic ice shaping. The stage was then toggled  
23 between melting and freezing rates to observe the ice crystal change as the temperature  
24 was increased and then decreased. Images of the single crystals were taken as the  
25 temperature was decreased to observe ice crystal growth.

### 26 **General method for cooling splat assays**

27 Using a micropipette, 10μL of sAFGP in PBS was dropped from 2 meters through a PVC  
28 pipe onto a precooled glass slide (aluminum block resting in a bed of dry ice) at -78.5°C  
29 to form a thin wafer. The slide containing the ice splat was quickly moved to a  
30 temperature-controlled microscope stage (Linkam LTS120, WCP, and T96 controller)  
31 precooled to -6.4°C. See SI notes 1–3 for details. Typically, ice wafers are annealed at a  
32 temperature ranging from -6–8°C to ensure that a eutectic phase is present at the crystal  
33 boundary and the ice is able to undergo recrystallization.<sup>84,85</sup> Use of PBS or a saline  
34 solution is essential due to the overestimation of IRI activity if observed in pure water.<sup>84,85</sup>  
35 The ice wafers were annealed for 40 minutes at -6.4°C, and images of the ice crystals  
36 were recorded at 0, 20, and 40 minutes using cross polarizers (MOTICAM S3, MOTIC  
37 BA310E LED Trinocular) to observe ice recrystallization inhibition. The stage chamber  
38 was purged with N<sub>2</sub> to prevent condensation from growing on the ice splat (See SI note  
39 4). From the images, ice MGS was determined using image processing software or  
40 manual measurements. To ensure statistical significance, three images were obtained for  
41 each sample, and grain sizes within a minimum of three 150<sup>2</sup> μm<sup>2</sup> regions per sample  
42 were measured. Regions toward the center of the wafer, rather than near the edges, were  
43 selected.

## 1 **General method for glycopolypeptide cellular internalization studies with HEK293** 2 **cells**

3 HEK 293 cells were plated on three 24 well plates and incubated at 37°C in 5% CO<sub>2</sub>  
4 overnight to allow the cells to adhere. After 24 hours, the cell media was removed. A  
5 100µM solution of A594-(βGalαGalNAcT<sub>0.33</sub>-s-A<sub>0.66</sub>)<sub>57</sub> in MilliQ was diluted in complete  
6 media to make a 10uM solution of polypeptide. The solution was sterile-filtered before  
7 300µL of the solution was applied to the cells. Additionally, 300µL of complete media was  
8 applied to additional wells of cells to serve as the untreated control. The 24 well plates  
9 were then placed at 37°C, RT, and 4°C to incubate for 1 hour. After one hour, the media  
10 was removed and the cells were rinsed 3x with DPBS. 500µL of Hoescht stain was then  
11 added to each well and cells were incubated for 10 minutes at RT. The cells were then  
12 fluorescently imaged to observe the localization of the fluorescent polymer.

## 13 **General method for freezing and thawing hRBCs for cryoprotection studies**

14 The cryopreservation of hRBC was conducted following published procedures.<sup>72</sup> In short,  
15 50µL hRBCs (prepared as discussed in SI) were mixed with 50µL of DPBS containing  
16 cryoprotectants or control solution in cryovials. The vials were then placed in a liquid  
17 nitrogen bath for 20 minutes. The samples were then thawed at room temperature for 20  
18 minutes. Control samples were also prepared according to this publication. hRBCs were  
19 added to water and frozen for 100% hemolysis and for 0% hemolysis, hRBCs were  
20 incubated with DPBS at room temperature for 1 hr. For all hRBC cryopreservation  
21 experiments, 2-hydroxyethyl starch (Spectrum Chemical, H3012) was used.

## 22 **References**

- 23 1. DeVries, A. L. & Wohlschlag, D. E. *Freezing Resistance in Some Antarctic Fishes.*  
24 **163**, 1073–1075 (American Association for the Advancement of Science, 1969).
- 25 2. Scholander, P. F. *et al.* Supercooling and osmoregulation in arctic fish. *J. Cell.*  
26 *Comp. Physiol.* **49**, 5–24 (1957).
- 27 3. GORDON, M. S., AMDUR, B. H. & SCHOLANDER, P. F. Freezing Resistance in  
28 Some Northern Fishes. *Biol. Bull.* **122**, 52–62 (1962).
- 29 4. Graham, L. A. & Davies, P. L. Glycine-Rich Antifreeze Proteins from Snow Fleas.  
30 *Science (80- )*. **310**, 461–461 (2005).
- 31 5. Meister, K., DeVries, A. L., Bakker, H. J. & Drori, R. Antifreeze Glycoproteins Bind  
32 Irreversibly to Ice. *J. Am. Chem. Soc.* **140**, 9365–9368 (2018).
- 33 6. Berger, T. *et al.* Synergy between Antifreeze Proteins Is Driven by  
34 Complementary Ice-Binding. *J. Am. Chem. Soc.* **141**, 19144–19150 (2019).
- 35 7. DeVries, A. L., Komatsu, S. K. & Feeney, R. E. Chemical and physical properties  
36 of freezing point-depressing glycoproteins from Antarctic fishes. *J. Biol. Chem.*  
37 **245**, 2901–2908 (1970).
- 38 8. DeVries, A. L. Glycoproteins as biological antifreeze agents in Antarctic fishes.  
39 *Science (80- )*. **172**, 1152–1155 (1971).
- 40 9. Eskandari, A., Leow, T. C., Rahman, M. B. A. & Oslan, S. N. *Antifreeze proteins*  
41 *and their practical utilization in industry, medicine, and agriculture.* *Biomolecules*

- 1           **10**, 1–18 (MDPI AG, 2020).
- 2   10.   Voets, I. K. From ice-binding proteins to bio-inspired antifreeze materials. *Soft*  
3       *Matter* **13**, 4808–4823 (2017).
- 4   11.   Meldolesi, A. GM fish ice cream. *Nat. Biotechnol.* **27**, 682–682 (2009).
- 5   12.   Bojic, S. *et al.* Winter is coming: the future of cryopreservation. *BMC Biology* **19**,  
6       56 (2021).
- 7   13.   Brockbank, K. G. M., Campbell, L. H., Greene, E. D., Brockbank, M. C. G. &  
8       Duman, J. G. Lessons from nature for preservation of mammalian cells, tissues,  
9       and organs. *In Vitro Cellular and Developmental Biology - Animal* **47**, 210–217  
10      (2011).
- 11  14.   Budke, C. *et al.* Quantitative efficacy classification of ice recrystallization inhibition  
12      agents. *Cryst. Growth Des.* **14**, 4285–4294 (2014).
- 13  15.   Knight, C. A., De Vries, A. L. & Oolman, L. D. Fish antifreeze protein and the  
14      freezing and recrystallization of ice. *Nature* **308**, 295–296 (1984).
- 15  16.   Chen, L., DeVries, A. L. & Cheng, C. H. C. Convergent evolution of antifreeze  
16      glycoproteins in Antarctic notothenioid fish and Arctic cod. *Proc. Natl. Acad. Sci.*  
17      *U. S. A.* (1997). doi:10.1073/pnas.94.8.3817
- 18  17.   Raymond, J. A., Radding, W. & DeVries, A. L. Circular dichroism of protein and  
19      glycoprotein fish antifreezes. *Biopolymers* **16**, 2575–2578 (1977).
- 20  18.   Franks, F. & Morris, E. R. Blood glycoprotein from antarctic fish possible  
21      conformational origin of antifreeze activity. *Biochim. Biophys. Acta - Gen. Subj.*  
22      **540**, 346–356 (1978).
- 23  19.   Detwiler, R. E., Schlirf, A. E. & Kramer, J. R. Rethinking Transition Metal  
24      Catalyzed N-Carboxyanhydride Polymerization: Polymerization of Pro and  
25      AcOPro N-Carboxyanhydrides. *J. Am. Chem. Soc.* **143**, 11482–11489 (2021).
- 26  20.   Carvajal-Rondanelli, P. A., Marshall, S. H. & Guzman, F. Antifreeze glycoprotein  
27      agents: Structural requirements for activity. *Journal of the Science of Food and*  
28      *Agriculture* (2011). doi:10.1002/jsfa.4473
- 29  21.   DeVries, A. L. Antifreeze glycopeptides and peptides: Interactions with ice and  
30      water. *Methods Enzymol.* **127**, 293–303 (1986).
- 31  22.   Biggs, C. I. *et al.* *Polymer mimics of biomacromolecular antifreezes.* *Nature*  
32      *Communications* **8**, 1–12 (Nature Publishing Group, 2017).
- 33  23.   Eniade, A. & Ben, R. N. Fully convergent solid phase synthesis of antifreeze  
34      glycoprotein analogues. *Biomacromolecules* **2**, 557–561 (2001).
- 35  24.   Wilkinson, B. L. *et al.* Total synthesis of homogeneous antifreeze glycopeptides  
36      and glycoproteins. *Angew. Chemie - Int. Ed.* **51**, 3606–3610 (2012).
- 37  25.   Eniade, A., Murphy, A. V., Landreau, G. & Ben, R. N. A general synthesis of  
38      structurally diverse building blocks for preparing analogues of C-linked antifreeze  
39      glycoproteins. *Bioconjug. Chem.* **12**, 817–823 (2001).

- 1 26. Tseng, P. H., Jiaang, W. T., Chang, M. Y. & Chen, S. T. Facile solid-phase  
2 synthesis of an antifreeze glycoprotein. *Chem. - A Eur. J.* **7**, 585–590 (2001).
- 3 27. Urbańczyk, M., Góra, J., Latajka, R. & Sewald, N. Antifreeze glycopeptides: from  
4 structure and activity studies to current approaches in chemical synthesis. *Amino*  
5 *Acids* **49**, 209–222 (2017).
- 6 28. Graham, B. *et al.* Polyproline as a Minimal Antifreeze Protein Mimic That  
7 Enhances the Cryopreservation of Cell Monolayers. *Angew. Chemie Int. Ed.* **56**,  
8 15941–15944 (2017).
- 9 29. Ben, R. N., Eniade, A. A. & Hauer, L. Synthesis of a C-linked antifreeze  
10 glycoprotein (AFGP) mimic: Probes for investigating the mechanism of action.  
11 *Org. Lett.* **1**, 1759–1762 (1999).
- 12 30. Liu, S. & Ben, R. N. C-linked galactosyl serine AFGP analogues as potent  
13 recrystallization inhibitors. *Org. Lett.* **7**, 2385–2388 (2005).
- 14 31. Tsuda, T. & Nishimura, S. I. Synthesis of an antifreeze glycoprotein analogue:  
15 Efficient preparation of sequential glycopeptide polymers. *Chem. Commun.* 2779–  
16 2780 (1996). doi:10.1039/cc9960002779
- 17 32. Huang, M. L. *et al.* Biomimetic peptoid oligomers as dual-action antifreeze agents.  
18 *Proc. Natl. Acad. Sci. U. S. A.* **109**, 19922–19927 (2012).
- 19 33. Filira, F. *et al.* Solid phase synthesis and conformation of sequential glycosylated  
20 polytripeptide sequences related to antifreeze glycoproteins. *Int. J. Biol.*  
21 *Macromol.* **12**, 41–49 (1990).
- 22 34. Tachibana, Y. *et al.* Antifreeze glycoproteins: Elucidation of the structural motifs  
23 that are essential for antifreeze activity. *Angew. Chemie - Int. Ed.* **43**, 856–862  
24 (2004).
- 25 35. Tachibana, Y. *et al.* Efficient and versatile synthesis of mucin-like glycoprotein  
26 mimics. *Tetrahedron* **58**, 10213–10224 (2002).
- 27 36. Deller, R. C., Vatish, M., Mitchell, D. A. & Gibson, M. I. Synthetic polymers enable  
28 non-vitreous cellular cryopreservation by reducing ice crystal growth during  
29 thawing. **5**, (2014).
- 30 37. Judge, N. *et al.* High Molecular Weight Polyproline as a Potential Biosourced Ice  
31 Growth Inhibitor: Synthesis, Ice Recrystallization Inhibition, and Specific Ice Face  
32 Binding. *Biomacromolecules* **24**, 2459–2468 (2023).
- 33 38. Tekin, K. & Daşkın, A. Effect of polyvinyl alcohol on survival and function of  
34 angora buck spermatozoa following cryopreservation. *Cryobiology* **89**, 60–67  
35 (2019).
- 36 39. Six, K. R., Lyssens, S., Devloo, R., Compernelle, V. & Feys, H. B. The ice  
37 recrystallization inhibitor polyvinyl alcohol does not improve platelet  
38 cryopreservation. *Transfusion* **59**, 3029–3031 (2019).
- 39 40. Graham, B., Fayter, A. E. R., Houston, J. E., Evans, R. C. & Gibson, M. I. Facially  
40 Amphipathic Glycopolymers Inhibit Ice Recrystallization. *J. Am. Chem. Soc.* **140**,



- 1 5682–5685 (2018).
- 2 41. Mitchell, D. E., Cameron, N. R. & Gibson, M. I. *Supplementary Information for*  
3 *Rational, yet simple, design and synthesis of an antifreeze-protein inspired*  
4 *polymer for cellular cryopreservation*. (2015).
- 5 42. Gibson, M. I., Barker, C. A., Spain, S. G., Albertin, L. & Cameron, N. R. Inhibition  
6 of ice crystal growth by synthetic glycopolymers: Implications for the rational  
7 design of antifreeze glycoprotein mimics. *Biomacromolecules* **10**, 328–333  
8 (2009).
- 9 43. Acker, J. P. *et al.* Small molecule ice recrystallization inhibitors enable freezing of  
10 human red blood cells with reduced glycerol concentrations. *Transfus. Med. Rev.*  
11 (2015). doi:10.1016/j.tmr.2015.05.005
- 12 44. Balcerzak, A. K., Capicciotti, C. J., Briard, J. G. & Ben, R. N. Designing ice  
13 recrystallization inhibitors: from antifreeze (glyco)proteins to small molecules.  
14 *RSC Adv.* **4**, 42682–42696 (2014).
- 15 45. Campos-García, V. R. *et al.* Process signatures in glatiramer acetate synthesis:  
16 Structural and functional relationships. *Sci. Rep.* **7**, 1–12 (2017).
- 17 46. Kramer, J. R., Onoa, B., Bustamante, C. & Bertozzi, C. R. Chemically tunable  
18 mucin chimeras assembled on living cells. *Proc. Natl. Acad. Sci.* **112**, 12574–  
19 12579 (2015).
- 20 47. Deleray, A. C. & Kramer, J. R. Biomimetic Glycosylated Polythreonines by N -  
21 Carboxyanhydride Polymerization. *Biomacromolecules* **23**, 1453–1461 (2022).
- 22 48. Raymond, J. A. & DeVries, A. L. Adsorption inhibition as a mechanism of freezing  
23 resistance in polar fishes. *Proc. Natl. Acad. Sci. U. S. A.* **74**, 2589–2593 (1977).
- 24 49. Liu, K. *et al.* Janus effect of antifreeze proteins on ice nucleation. *Proc. Natl.*  
25 *Acad. Sci. U. S. A.* **113**, 14739–14744 (2016).
- 26 50. Ben, R. N. Antifreeze glycoproteins - Preventing the growth of ice. *ChemBioChem*  
27 **2**, 161–166 (2001).
- 28 51. Mochizuki, K. & Molinero, V. Antifreeze Glycoproteins Bind Reversibly to Ice via  
29 Hydrophobic Groups. *J. Am. Chem. Soc.* **140**, 4803–4811 (2018).
- 30 52. Pandey, P. & Mallajosyula, S. S. Elucidating the role of key structural motifs in  
31 antifreeze glycoproteins. *Phys. Chem. Chem. Phys.* **21**, 3903–3917 (2019).
- 32 53. Ebbinghaus, S. *et al.* Antifreeze glycoprotein activity correlates with long-range  
33 protein-water dynamics. *J. Am. Chem. Soc.* **132**, 12210–12211 (2010).
- 34 54. Tsuda, S. *et al.* Fish-derived antifreeze proteins and antifreeze glycoprotein  
35 exhibit a different ice-binding property with increasing concentration.  
36 *Biomolecules* **10**, (2020).
- 37 55. Sarno, D. M., Murphy, A. V., DiVirgilio, E. S., Jones, W. E. & Ben, R. N. Direct  
38 observation of antifreeze glycoprotein-fraction 8 on hydrophobic and hydrophilic  
39 interfaces using atomic force microscopy. *Langmuir* **19**, 4740–4744 (2003).

- 1 56. Younes-Metzler, O., Ben, R. N. & Giorgi, J. B. The adsorption of antifreeze  
2 glycoprotein fraction 8 on dry and wet mica. *Colloids Surfaces B Biointerfaces* **82**,  
3 134–140 (2011).
- 4 57. Hederos, M., Konradsson, P., Borgh, A. & Liedberg, B. Mimicking the properties  
5 of antifreeze glycoproteins: Synthesis and characterization of a model system for  
6 ice nucleation and antifreeze studies. *J. Phys. Chem. B* **109**, 15849–15859  
7 (2005).
- 8 58. Shier, W. T., Lin, Y. & De Vries, A. L. Structure and mode of action of  
9 glycoproteins from an antarctic fish. *BBA - Protein Struct.* **263**, 406–413 (1972).
- 10 59. Sun, Y. *et al.* Disaccharide Residues are Required for Native Antifreeze  
11 Glycoprotein Activity. *Biomacromolecules* **22**, 2595–2603 (2021).
- 12 60. Coltart, D. M. *et al.* Principles of mucin architecture: Structural studies on  
13 synthetic glycopeptides bearing clustered mono-, di-, tri-, and hexasaccharide  
14 glycodomains. *J. Am. Chem. Soc.* **124**, 9833–9844 (2002).
- 15 61. Mimura, Y., Yamamoto, Y., Inoue, Y. & Chûjô, R. N.m.r. study of interaction  
16 between sugar and peptide moieties in mucin-type model glycopeptides. *Int. J.*  
17 *Biol. Macromol.* **14**, 242–248 (1992).
- 18 62. Lambu, M. R. *et al.* Synthesis of C-spiro-glycoconjugates from sugar lactones via  
19 zinc mediated Barbier reaction. *RSC Adv.* **4**, 11023–11028 (2014).
- 20 63. Kramer, J. R. & Deming, T. J. General method for purification of  $\alpha$ -amino acid-N-  
21 carboxyanhydrides using flash chromatography. *Biomacromolecules* **11**, 3668–  
22 3672 (2010).
- 23 64. van Stokkum, I. H., Spoelder, H. J., Bloemendal, M., van Grondelle, R. & Groen,  
24 F. C. Estimation of protein secondary structure and error analysis from circular  
25 dichroism spectra. *Anal. Biochem.* **191**, 110–118 (1990).
- 26 65. Provencher, S. W. & Glöckner, J. Estimation of Globular Protein Secondary  
27 Structure from Circular Dichroism. *Biochemistry* **20**, 33–37 (1981).
- 28 66. Chemes, L. B., Alonso, L. G., Noval, M. G. & De Prat-Gay, G. Circular dichroism  
29 techniques for the analysis of intrinsically disordered proteins and domains.  
30 *Methods Mol. Biol.* **895**, 387–404 (2012).
- 31 67. Lopes, J. L. S., Miles, A. J., Whitmore, L. & Wallace, B. A. Distinct circular  
32 dichroism spectroscopic signatures of polyproline II and unordered secondary  
33 structures: Applications in secondary structure analyses. *Protein Sci.* **23**, 1765–  
34 1772 (2014).
- 35 68. Yang, J., Zhao, K., Gong, Y., Vologodskii, A. & Kallenbach, N. R.  $\alpha$ -Helix  
36 nucleation constant in copolypeptides of alanine and ornithine or lysine. *J. Am.*  
37 *Chem. Soc.* **120**, 10646–10652 (1998).
- 38 69. Best, B. P. Cryoprotectant Toxicity: Facts, Issues, and Questions. *Rejuvenation*  
39 *Res.* **18**, 422 (2015).
- 40 70. Ahlgren, J. A. *et al.* FREEZING AVOIDANCE AND THE DISTRIBUTION OF

- 1 ANTIFREEZE GLYCOPEPTIDES IN BODY FLUIDS AND TISSUES OF  
2 ANTARCTIC FISH. *J. exp. Biol* **137**, 9 (1988).
- 3 71. Lui, S. *et al.* In vitro studies of antifreeze glycoprotein (AFGP) and a C-linked  
4 AFGP analogue. *Biomacromolecules* **8**, 1456–1462 (2007).
- 5 72. Sun, Y. *et al.* Ice Recrystallization Inhibition Is Insufficient to Explain  
6 Cryopreservation Abilities of Antifreeze Proteins. *Biomacromolecules* **23**, 1214–  
7 1220 (2022).
- 8 73. Wu, Y., Banoub, J., Goddard, S. V., Kao, M. H. & Fletcher, G. L. Antifreeze  
9 glycoproteins: Relationship between molecular weight, thermal hysteresis and the  
10 inhibition of leakage from liposomes during thermotropic phase transition. *Comp.*  
11 *Biochem. Physiol. - B Biochem. Mol. Biol.* **128**, 265–273 (2001).
- 12 74. Hays, L. M., Feeney, R. E., Crowe, L. M., Crowe, J. H. & Oliver, A. E. *Antifreeze*  
13 *glycoproteins inhibit leakage from liposomes during thermotropic phase*  
14 *transitions. Proceedings of the National Academy of Sciences of the United*  
15 *States of America* **93**, 6835–6840 (1996).
- 16 75. Schekman, R. & Singer, S. J. Clustering and endocytosis of membrane receptors  
17 can be induced in mature erythrocytes of neonatal but not adult humans. *Proc.*  
18 *Natl. Acad. Sci. U. S. A.* **73**, 4075–4079 (1976).
- 19 76. Rawlings, N. D. & Salvesen, G. Handbook of Proteolytic Enzymes. *Handb.*  
20 *Proteolytic Enzym.* **1–3**, (2013).
- 21 77. Malaker, S. A. *et al.* The mucin-selective protease StcE enables molecular and  
22 functional analysis of human cancer-associated mucins. *Proc Natl Acad Sci* **116**,  
23 7278–7287 (2019).
- 24 78. Wardzala, C. L., Clauss, Z. S. & Kramer, J. R. Principles of glycocalyx  
25 engineering with hydrophobic-anchored synthetic mucins. *Front. Cell Dev. Biol.*  
26 **10**, 1–13 (2022).
- 27 79. Lovelock, J. E. & Bishop, M. W. H. Prevention of freezing damage to living cells  
28 by dimethyl sulphoxide. *Nature* **183**, 1394–1395 (1959).
- 29 80. Verheijen, M. *et al.* DMSO induces drastic changes in human cellular processes  
30 and epigenetic landscape in vitro. *Sci. Rep.* **9**, (2019).
- 31 81. Stolzing, A., Naaldijk, Y., Fedorova, V. & Sethe, S. Hydroxyethylstarch in  
32 cryopreservation - Mechanisms, benefits and problems. *Transfus. Apher. Sci.* **46**,  
33 137–147 (2012).
- 34 82. Robles, V., Valcarce, D. G. & Riesco, M. F. The use of antifreeze proteins in the  
35 cryopreservation of gametes and embryos. *Biomolecules* **9**, (2019).
- 36 83. Ekpo, M. D. *et al.* Antifreeze Proteins: Novel Applications and Navigation towards  
37 Their Clinical Application in Cryobanking. *Int. J. Mol. Sci.* **23**, 23 (2022).
- 38 84. Knight, C. A., Wen, D. & Laursen, R. A. Nonequilibrium Antifreeze Peptides and  
39 the Recrystallization of Ice. *Cryobiology* **32**, 23–34 (1995).
- 40 85. Biggs, C. I. *et al.* Mimicking the Ice Recrystallization Activity of Biological

1 Antifreezes. When is a New Polymer “Active”? *Macromolecular Bioscience*  
2 (2019). doi:10.1002/mabi.201900082

3

4

5 **TOC Graphic:**

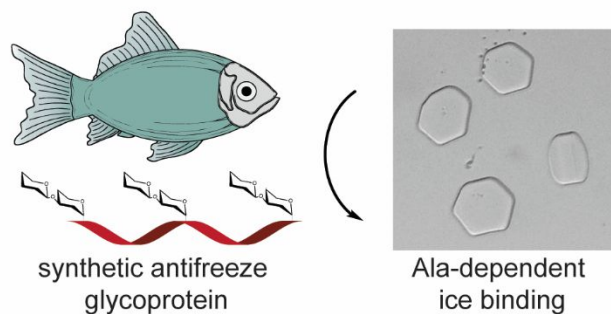

6

7 **Synopsis:**

8 Scalable, tunable polymer mimics of antifreeze glycoproteins found in polar fish bind and  
9 shape ice crystals in an Ala-dependent manner, offering new opportunities for  
10 cryoprotection.
